# Supplementary material for: Cromoglycate mesogen forms isodesmic assemblies promoted by peptides and induces aggregation of a range of proteins
Source: Royal Society of Chemistry journal article supplement (doi:10.1039/c8ra05226c), 2018-01-01
Supplement: c8ra05226c1.pdf [file c8ra05226c1.pdf]

Supporting Information

# Cromoglycate Mesogen Forms Isodesmic Assembly Promoted by Peptides and Induces Aggregation of a Range of Proteins

Arizza Chiara S. Ibanez,<sup>a</sup> Elaine Marji<sup>a†</sup> Yan-Yeung Luk<sup>a\*</sup>

<sup>a</sup>Chemistry Department, Syracuse University, Syracuse, NY 13244-4100, United States

† Undergraduate researcher

\*Corresponding author: E-mail: [yluk@syr.edu](mailto:yluk@syr.edu)

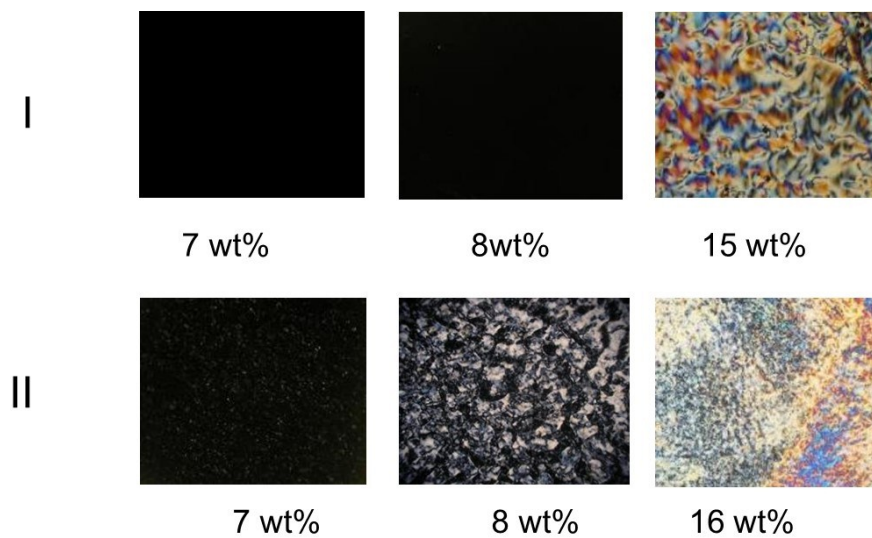

**Figure S1** Images of 5' DSCG solutions at different concentrations in (I) Millipore water (II) Luria Bertani (LB) media (1 wt% sodium chloride, 1 wt% tryptone and 0.5 wt% yeast extract) viewed under cross polars.

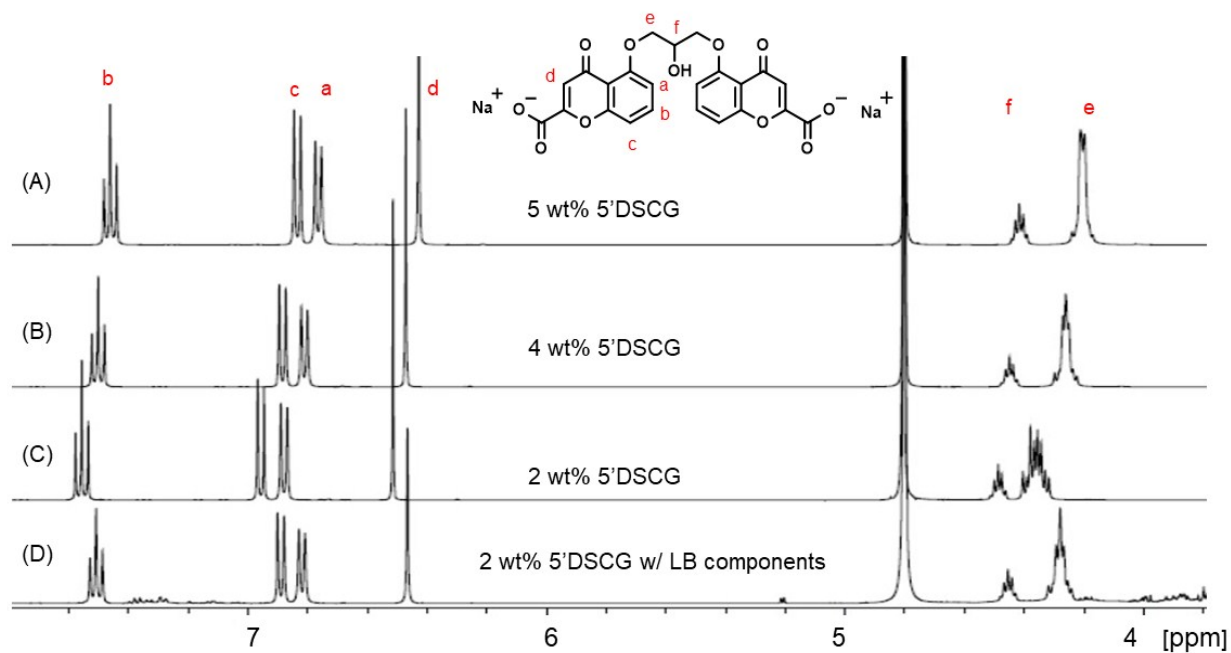

**Figure S2** <sup>1</sup>H NMR spectra of 5 wt% 5'DSCG (A), 4 wt% 5'DSCG (B), 2 wt% 5'DSCG without (C) and with LB components (D) in D<sub>2</sub>O. The protons of 5'DSCG and peak assignments are labelled in red.

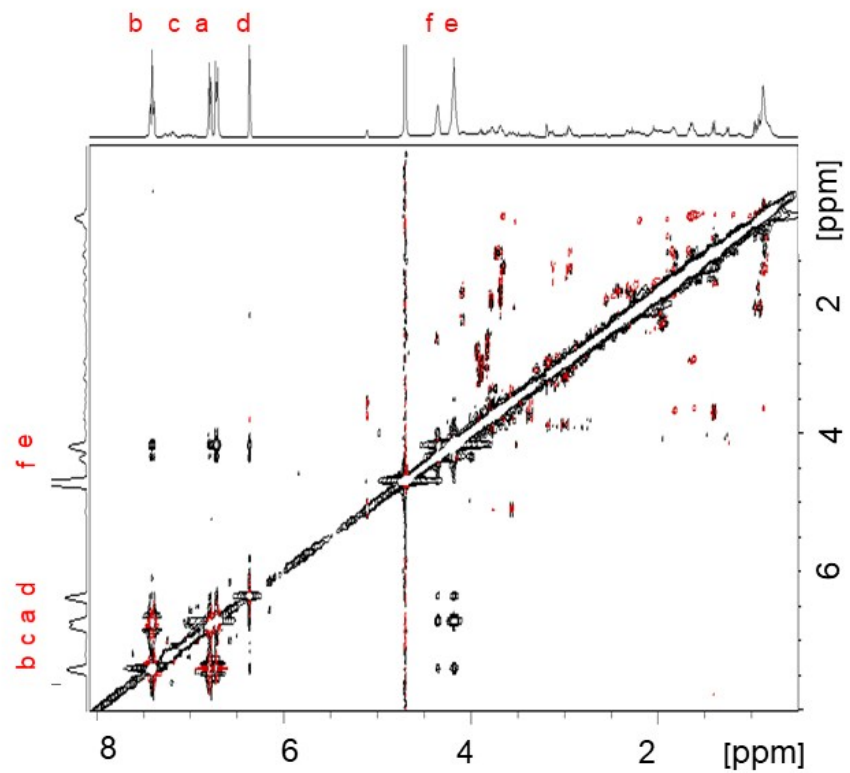

**Figure S3** NOESY spectra of 2 wt% 5'DSCG with LB components (1 wt% sodium chloride, 1 wt% tryptone and 0.5 wt% yeast extract).

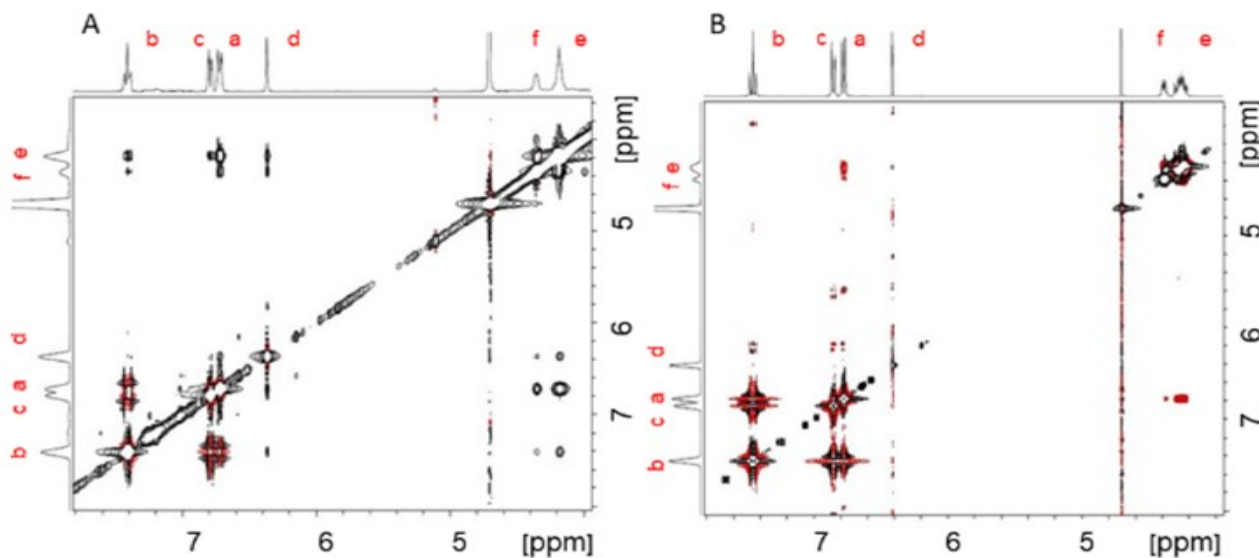

**Figure S4** NOESY spectra of 2 wt% 5'DSCG with (A) and without (B) LB components in D<sub>2</sub>O. Same phase (with respect to the diagonal) NOE cross-peaks in black and opposite phase (with respect to the diagonal) NOE cross-peaks in red. The protons of 5'DSCG and peak assignments are labelled in red.

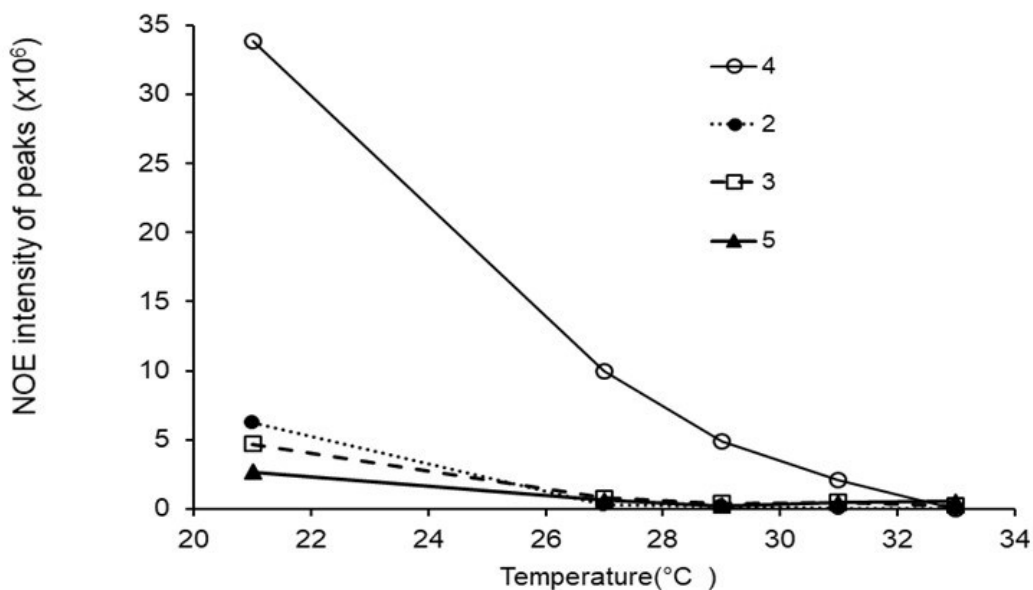

**Figure S5** Plot of intensity of NOE cross peaks vs. temperature for 2 wt% 5'DSCG with LB components.

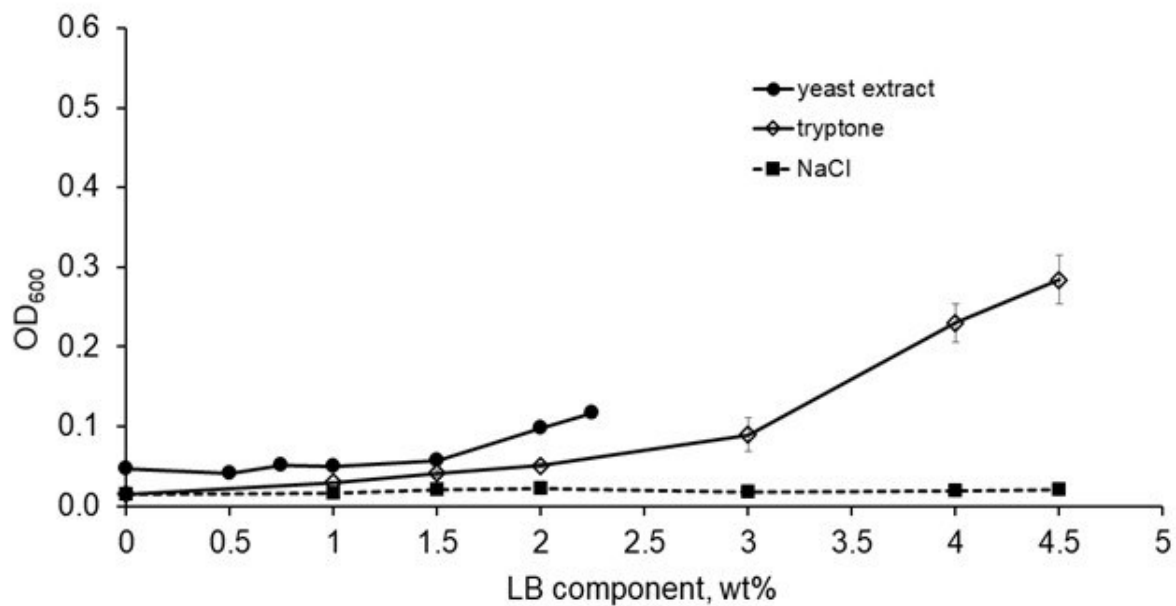

**Figure S6** Optical density (OD<sub>600</sub>) measurements of solutions containing 7 wt% 5'DSCG mixed with individual LB media components: yeast extract, tryptone and sodium chloride at different concentrations. (7 wt% 5'DSCG with yeast extract at concentration higher than 2.5 wt% caused precipitation).

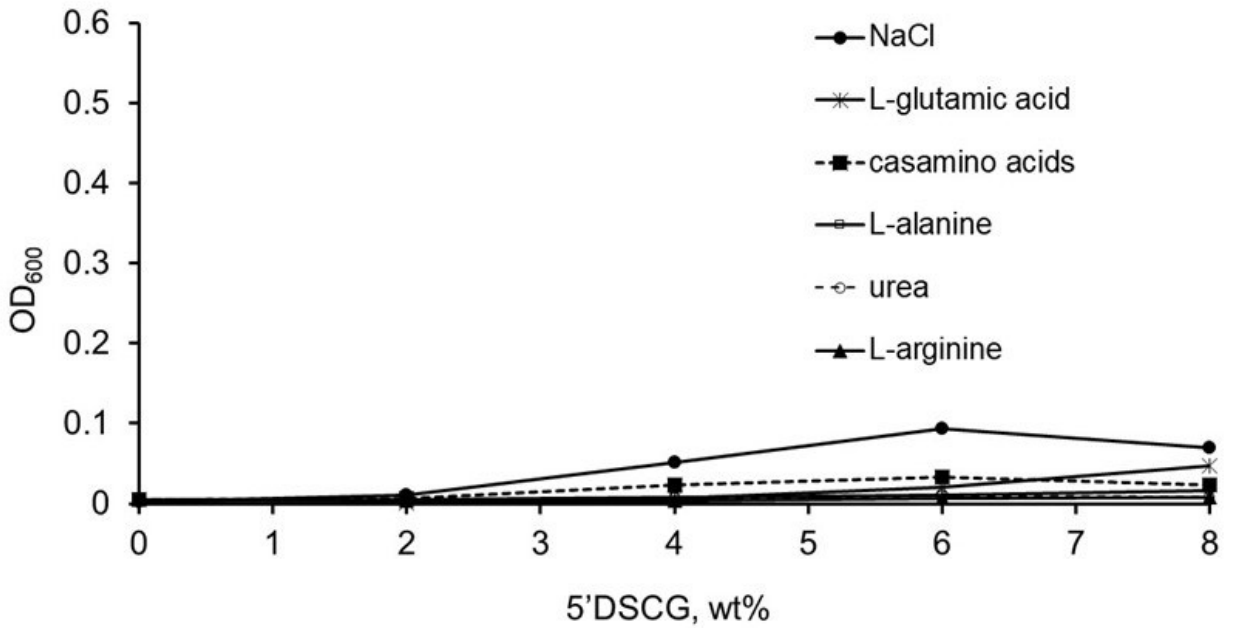

**Figure S7** Optical density (OD<sub>600</sub>) measurements of solutions containing additives: 4.6 wt% NaCl, 1 wt% casamino acids, 31.5 wt% urea, 8.53 wt% L- glutamic acid, 2.35 wt% L-alanine and 2.94 wt% L-arginine mixed with different concentrations of 5'DSCG.

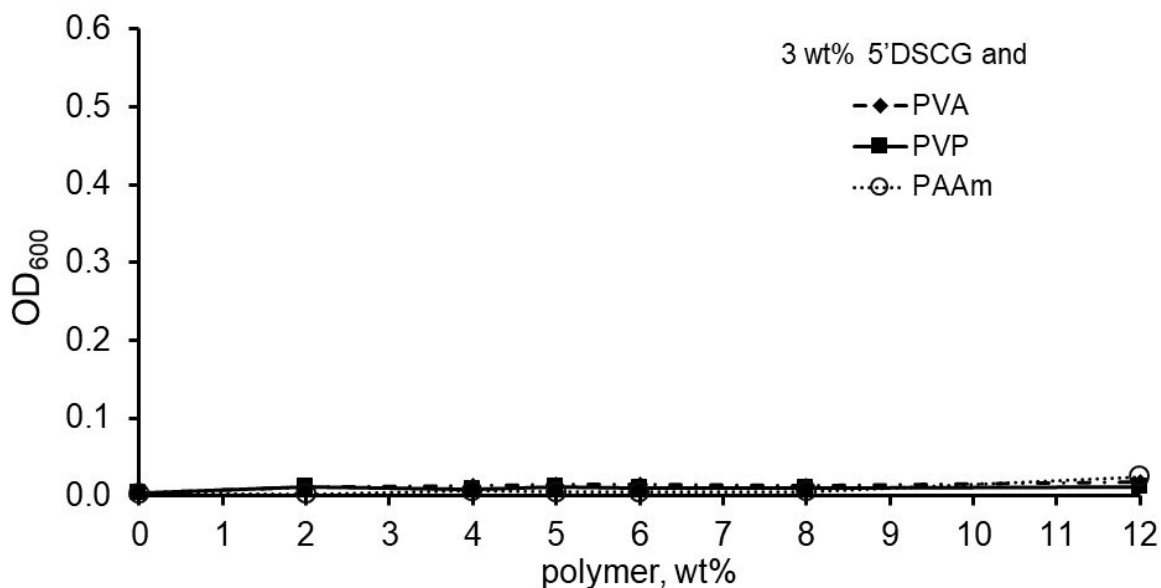

**Figure S8** Optical density (OD<sub>600</sub>) measurements of solutions containing 3 wt% 5'DSCG mixed with different concentrations of non-ionic polymers: poly-vinylalcohol (PVA, mw ~ 9,000-10,000), poly-vinylpyrrolidone (PVP, mw ~40,000), and poly-acrylamide (PAAm, mw ~ 9,000-10,000)

**Table S1** Pili protein precipitation with NaCl and 5'DSCG as precipitants.

|                 | Reservoir Solution |                               |                               |                |
|-----------------|--------------------|-------------------------------|-------------------------------|----------------|
|                 | 2.8 wt% NaCl       | 0.25 wt% 5'DSCG               | 0.5 wt% 5'DSCG                | 1 wt% 5'DSCG   |
| 5 mg/mL powder  | no precipitate     | with precipitate <sup>1</sup> | with precipitate <sup>2</sup> | no precipitate |
| 10 mg/mL powder | no precipitate     | with precipitate <sup>1</sup> | with precipitate <sup>2</sup> | no precipitate |
| 20 mg/mL powder | no precipitate     | with precipitate <sup>1</sup> | with precipitate <sup>2</sup> | no precipitate |

Precipitate observed after 3 days<sup>1</sup> and 5 days<sup>2</sup>



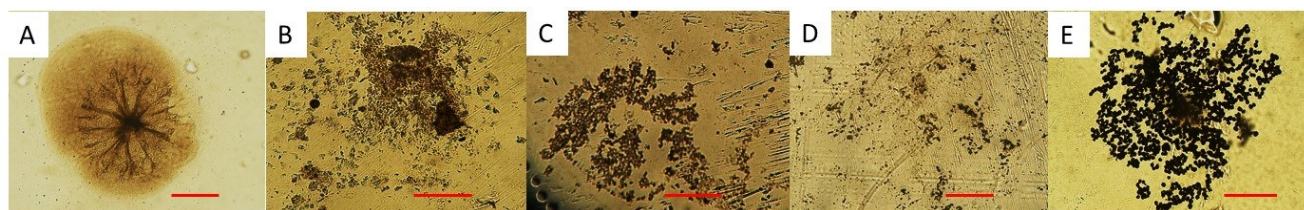

**Figure S9** Different protein aggregates induced by 5'DSCG in hanging droplets. The droplets (5  $\mu$ L) contained (A) 0.625 wt% 5'DSCG and 25 mg/mL pilin, (B) 0.625 wt% 5'DSCG and 1 mg/mL lectin A, (C) 0.625 wt% 5'DSCG and 20.5 mg/mL esterase, (D) 0.625 wt% 5'DSCG and 20.5 mg/mL bovine serum albumin, and (E) 0.14 wt% 5'DSCG + 37.5 mg/mL lipase. The reservoir solution contained 350  $\mu$ L of (A, B, C, D) 1.25 wt% 5'DSCG, and (E) 0.28 wt% 5'DSCG. Hanging drops kept at ambient temperature were observed over 5-15 days. All solutions were prepared using 25 mM Tris buffer, pH = 7.5; except for (D) where pH = 6.5. Scale bar = 380 $\mu$ m

**Table S2** Mass and isoelectric point (pI) of proteins used in 5'DSCG aggregation.

| Protein                | pilin | truncated pilin   | lectin A | esterase | lipase               | bovine serum albumin | trypsin |
|------------------------|-------|-------------------|----------|----------|----------------------|----------------------|---------|
| Mass (kDa)             | 15.5  | 12.2 <sup>a</sup> | 12.9     | 63       | 60                   | 66                   | 24      |
| Isoelectric point (pI) | 6.59  | 7.94              | 4.88     | 5.0      | 4.8/5.8 <sup>b</sup> | 4.7                  | 10.1    |

<sup>a</sup> mass and pI calculated using pI/MW tool (<https://web.expasy.org>)

<sup>b</sup>pI of two isoforms of lipase extracted from crude lipase type VII (used in the experiment) (lipase1: pI= 4.8, lipase3: pI -5.8)

## References

1. G. L. Winsor, E. J. Griffiths, R. Lo, B. K. Dhillon, J. A. Shay and F. S. Brinkman, *Nucleic acids research*, 2015, **44**, D646-D653.
2. D. L. Barker and W. P. Jencks, *Biochemistry*, 1969, **8**, 3879-3889.
3. A. J. Adler and G. Kistiakowsky, *Journal of Biological Chemistry*, 1961, **236**, 3240-3245.
4. E. Heymann, W. Junge and K. Krisch, *FEBS letters*, 1971, **12**, 189-193.
5. N. López, M. A. Pernas, L. M. Pastrana, A. Sánchez, F. Valero and M. L. Rúa, *Biotechnology Progress*, 2004, **20**, 65-73.
6. K. Hirayama, S. Akashi, M. Furuya and K.-i. Fukuhara, *Biochemical and Biophysical Research Communications*, 1990, **173**, 639-646.
7. D. Malamud and J. W. Drysdale, *Analytical Biochemistry*, 1978, **86**, 620-647.
8. K. A. Walsh, in *Methods in Enzymology*, Academic Press, 1970, vol. 19, pp. 41-63.
